# Supplementary material
Source: PubMed Central journal article supplement (PMC2858231)

## Supplemental Material

### Figure Legends

Figure S1. Image of Gel 1 indicating the location of the gel features selected for tandem mass spectroscopy. Samples represent 24 hpf normoxic (Cy 2), 24 hpf + 1 h anoxia (Cy 5), and 24 hpf +1 h normoxia (Cy 3).

Figure S2. Image of Gel 2 indicating the location of the gel features selected for tandem mass spectroscopy. Samples represent 24 hpf normoxic (Cy 5), 24 hpf + 24 h anoxia (Cy 2), and 24 hpf +6 h normoxia (Cy 3).

Figure S3. Image of Gel 3 indicating the location of the gel features selected for tandem mass spectroscopy. Samples represent 24 hpf normoxic (Cy 2), 24 hpf + 24 h anoxia (Cy 5), and 24 hpf +24 h normoxia (Cy 3).

Table S1. Complete list of peptides identified by MS/MS from Gels 1-4.

Table S2. gi numbers utilized for pathway analysis.

Table S3. Full name of proteins networked in Figure 4.

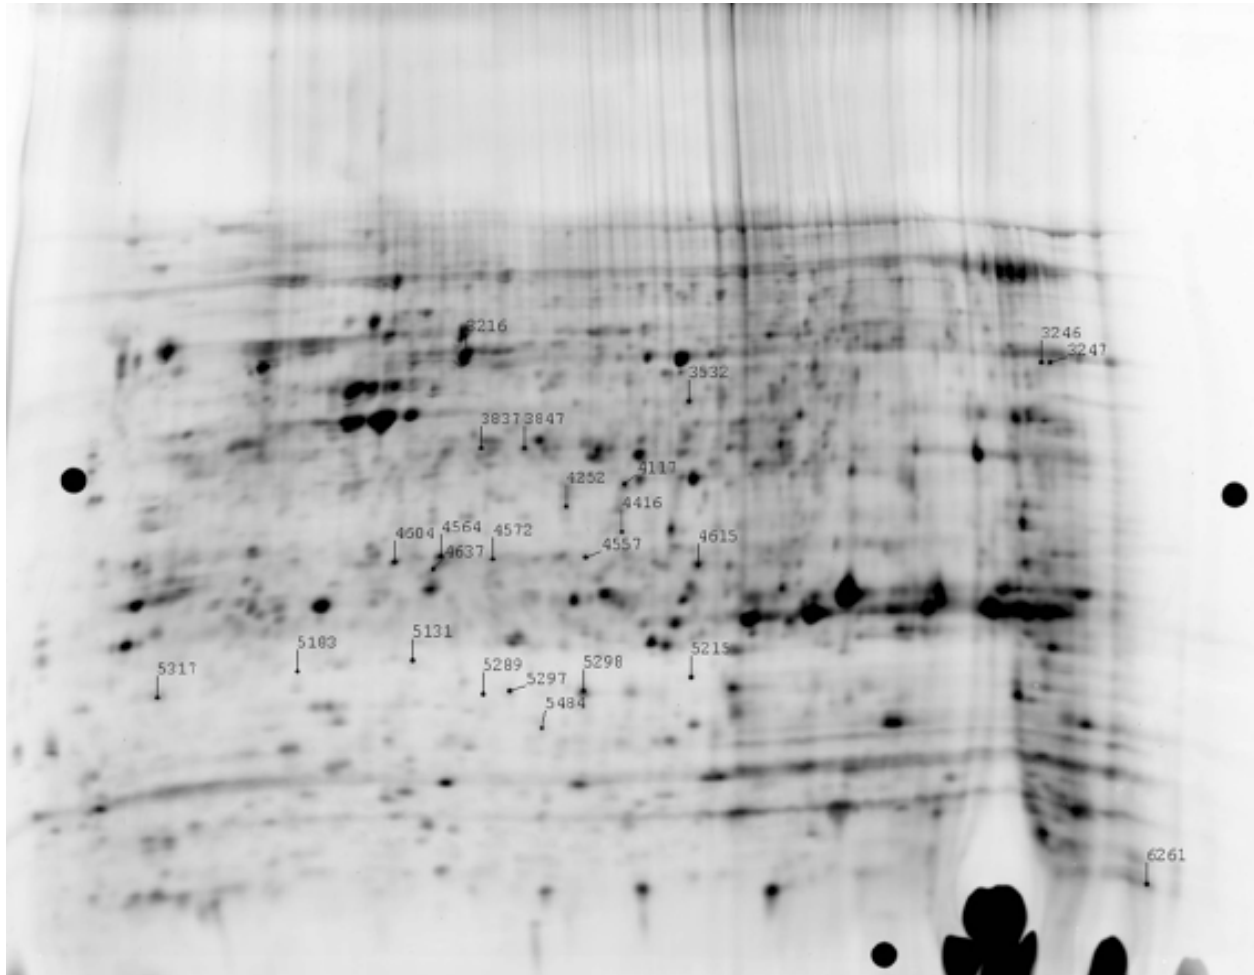

AC

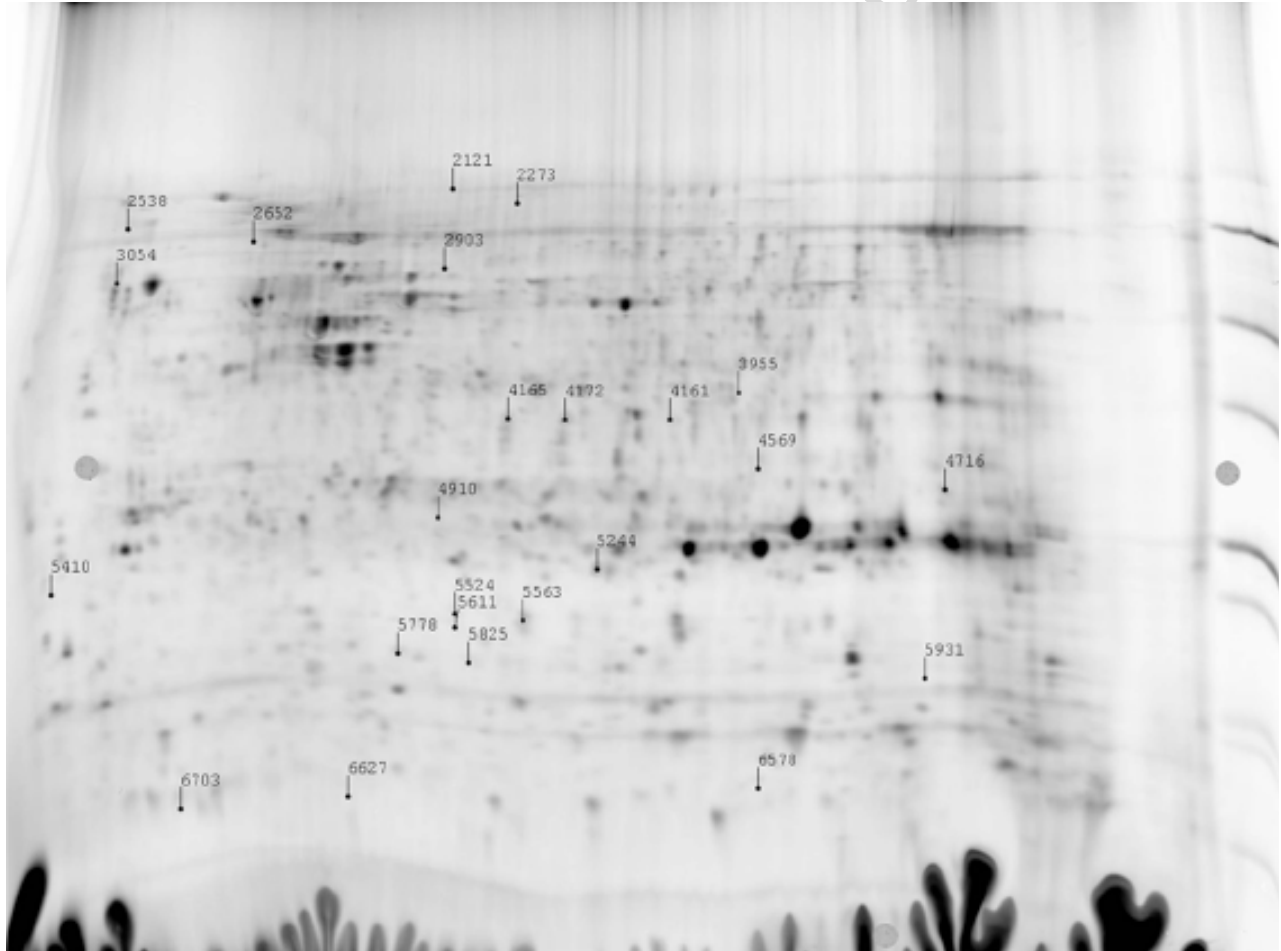

DT

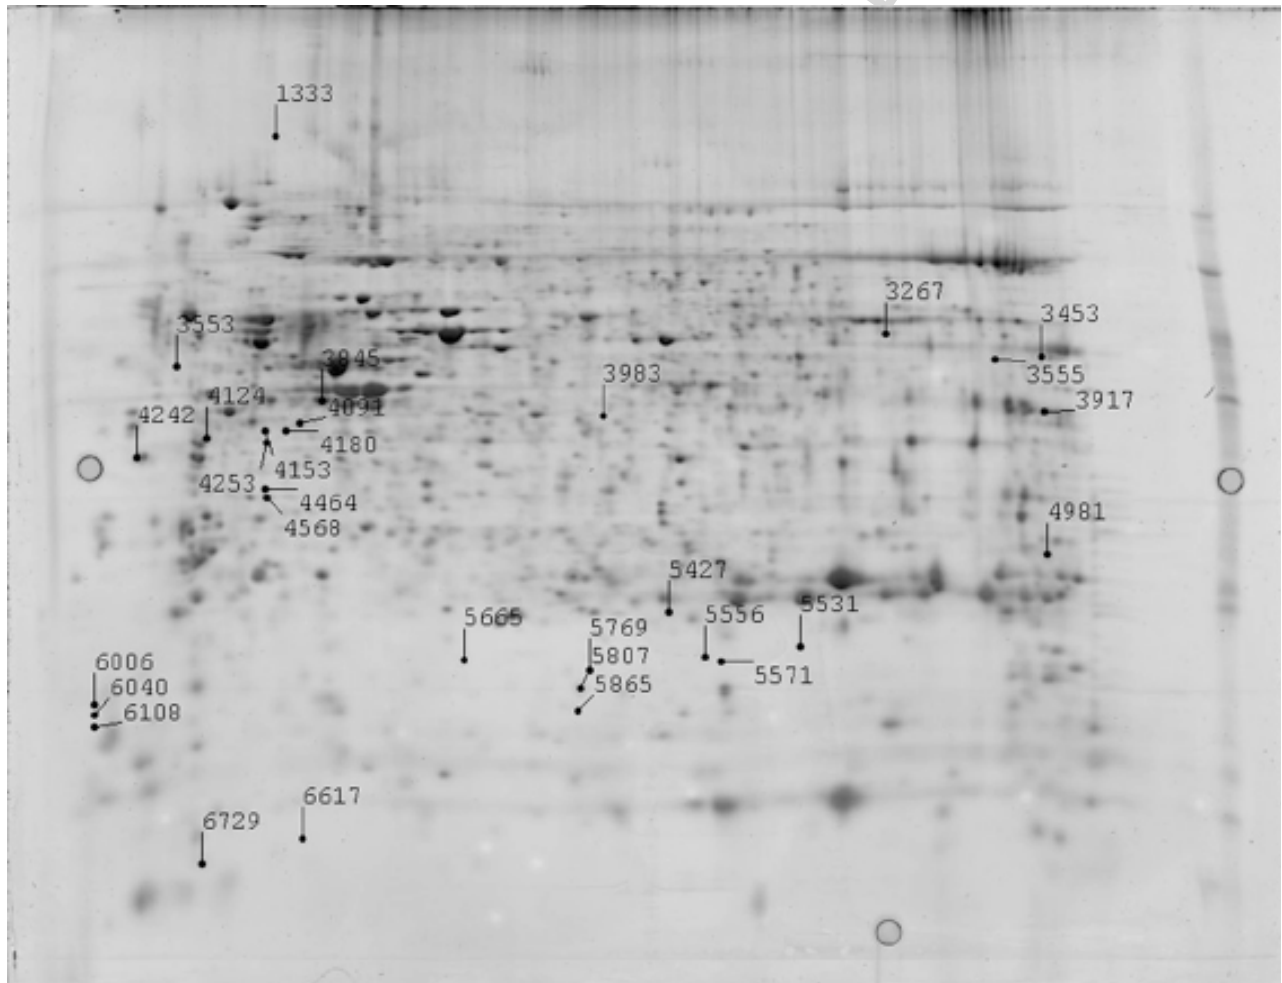

Supplement: NIHMS96231-supplement-supplement_1.pdf [file NIHMS96231-supplement-supplement_1.pdf]
